# Supplementary material
Source: Springer Nature journal article supplement (https://www.springermedizin.de/resource/supplementary/12936_2009_951_MOESM7_ESM.pdf/9548612)

Comparator better

AS&AQ better

**DP** (n=463)  
**AHR=0.35 (0.22-0.56)**

**AS+SP** (n=1,005)  
**AHR=0.88 (0.70-1.11)**

**AL** (n=1,319)  
**AHR=0.54 (0.42-0.68)**

**AQ+SP** (n=1,257)  
**AHR=1.77 (1.44-2.17)**

**AQ** (n=621)  
**AHR=2.59 (1.56-4.29)**

**CQ+SP** (n=699)  
**AHR=2.29 (1.84-2.85)**

**AS4** (n=252)  
**AHR=0.67 (0.43-1.05)**

0 1 2 3 4 5

**Adjusted hazard ratio**

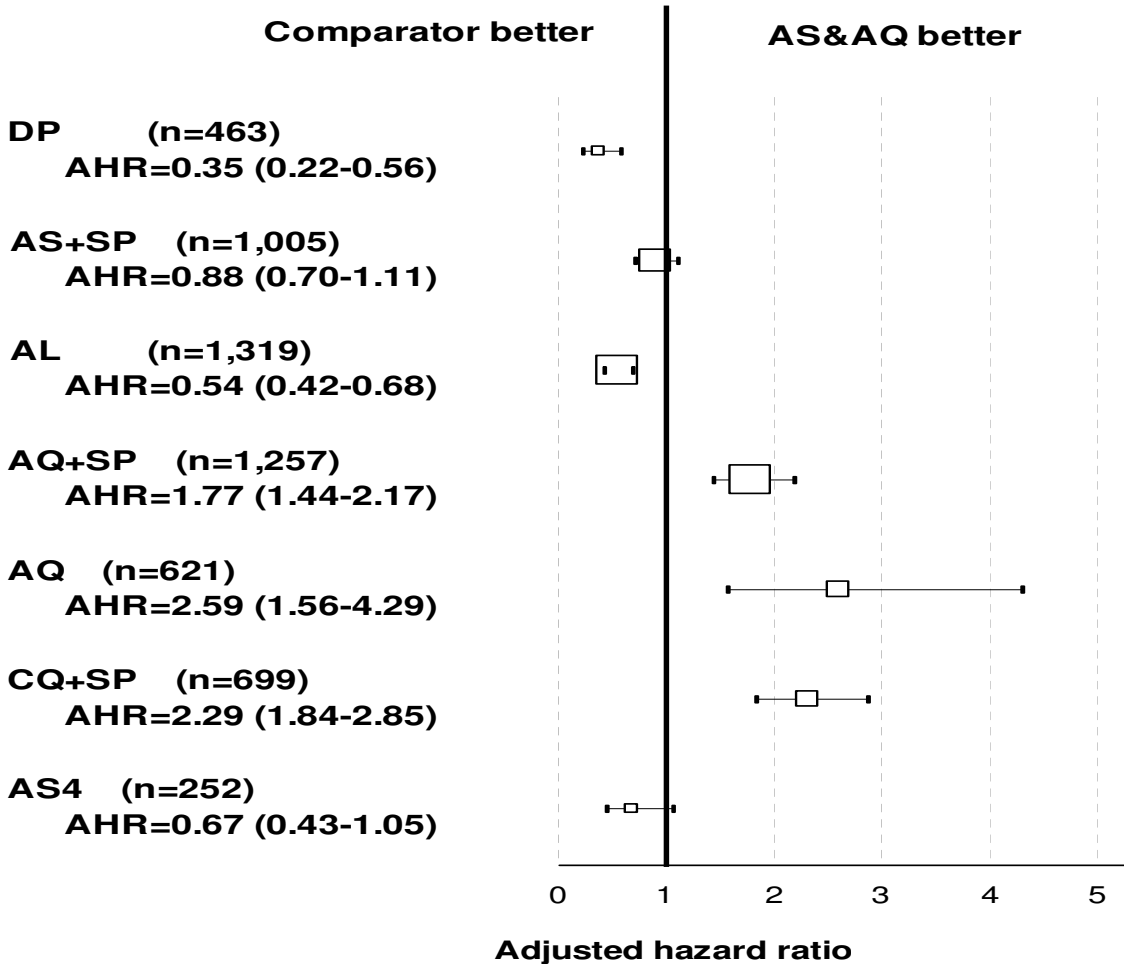

Supplement: MOESM7 [file 9548612]
